# Supplementary material for: Photodynamic Diagnostic Ureteroscopy Using The VISERA ELITE® Video System For Diagnosis of Upper-Urinary Tract Urothelial Carcinoma: A Prospective Cohort Pilot Study
Source: Research Square preprint supplement (doi:10.21203/rs.3.rs-143091/v1), 2021-01-18
Supplement: Supplementary file 1 [file 60a568e111a049ade8c1f824.xlsx]

## Sheet: Table 3
	Table 3
	Study	Country	Study design	Objective	Sample size	Video system supplier	Sensitivity (%)	Specificity (%)
	Waidelich (1998)17	Germany	Pilot study	PDTa	4	Not stated	-	-
	Somani et al. (2010)18	UK	Pilot study	PDDb	4	Karl Storz	-	-
	Audenet et al. (2012)19	France	Review	-	-	-	-	-
	Ahmad et al. (2012)20	UK	Prospective cohort	PDD	26	Karl Storz	100	62.5
	Aboumarzouk et al. (2012)21	UK	Prospective cohort	PDD	32	Karl Storz	96	100
	Aboumarzouk et al. (2013)22	UK	Prospective cohort	PDD	30	Karl Storz	94	100
	Bondad et al. (2013)25	UK	Retrospective	Unknown	24	-	-	-
	Kata et al. (2014)9	UK	Review	PDD	-	Karl Storz	-	-
	Kata et al. (2016)10	UK	Prospective cohort	PDD	54	Karl Storz	95.8	96.6
	Osman et al. (2017)	Bahrain	Review	-	-	-	-	-
	This study (2019)	Japan	Prospective cohort	PDD	20	VISERA ELITE, Olympus	62.5	0.673
							aPDT: photodynamic therapy
							bPDD: photodynamic diagnosis
