# Supplementary material for: Photodynamic Diagnostic Ureteroscopy Using The VISERA ELITE® Video System For Diagnosis of Upper-Urinary Tract Urothelial Carcinoma: A Prospective Cohort Pilot Study
Source: Research Square preprint supplement (doi:10.21203/rs.3.rs-143091/v1), 2021-01-18
Supplement: Supplementary file 4 [file d57290e3cbd3c517714c2097.xlsx]

## Sheet: Table 2
		Table 2
		A. Analysis by participant (n = 18)
					Normal observation				ALA-PDD				Combined observation
					Positive	Negative	Total		Positive	Negative	Total		Positive	Negative	Total
			Pathological diagnosis	UC	13	2	15		12	3	15		15	0	15
				Non-UC	1	2	3		2	1	3		2	1	3
			Total		14	4	18		14	4	18		17	1	18
			Accuracy of each observational method		Sensitivity		86.7%		Sensitivity		80.0%		Sensitivity		100.0%
					Specificity		66.7%		Specificity		33.3%		Specificity		33.3%
					PLRa		2.6		PLR		1.2		PLR		1.5
					NLRb		0.2		NLR		0.6		NLR		-
					FPRc		13.3%		FPR		20.0%		FPR		0.0%
					FNRd		33.3%		FNR		66.7%		FNR		66.7%
					PPVe		92.9%		PPV		85.7%		PPV		88.2%
					NPVf		50.0%		NPV		25.0%		NPV		100.0%
		B. Analysis by biopsy specimen (n = 92)
					Normal observation				ALA-PDD				Combined observation
					Positive	Negative	Total		Positive	Negative	Total		Positive	Negative	Total
			Pathological diagnosis	Urothelial carcinoma	25	15	40		25	15	40		29	11	40
				Non-urothelial carcinoma	14	38	52		17	35	52		25	27	52
			Total		39	53	92		42	50	92		54	38	92
			Accuracy of each observational method		Sensitivity		62.5%		Sensitivity		62.5%		Sensitivity		72.5%
					Specificity		73.1%		Specificity		67.3%		Specificity		51.9%
					PLR		2.3		PLR		1.9		PLR		1.5
					NLR		0.5		NLR		0.4		NLR		0.5
					FPR		37.5%		FPR		37.5%		FPR		27.5%
					FNR		26.9%		FNR		32.7%		FNR		48.1%
					PPV		64.1%		PPV		59.5%		PPV		53.7%
					NPV		71.7%		NPV		70.0%		NPV		71.1%
					aPLR: positive likelihood ratio					bNLR: negative likelihood ratio
					cFPR: false positive ratio					dFNR: false negative ratio
					ePPV: positive predictive value					fNPV: negative predictive value
