# Supplementary material for: Photodynamic Diagnostic Ureteroscopy Using The VISERA ELITE® Video System For Diagnosis of Upper-Urinary Tract Urothelial Carcinoma: A Prospective Cohort Pilot Study
Source: Research Square preprint supplement (doi:10.21203/rs.3.rs-143091/v1), 2021-01-18
Supplement: Supplementary file 5 [file da4f3d5bb4a4fa0ab3c2d39d.xlsx]

## Sheet: Table 1
	Table 1
						Number of patients	(%)
		Median age (IQR)				71	(67-79)
		Gender
		Male				16	(80)
		Female				4	(20)
		Co-morbidities
		Malignancy				2	(10)
		Urothelial carcinoma				1	(5)
		UT-UC				0
		Bladder cancer				1	(5)
		Other				0
		Cardiovascular diseases				5	(25)
		Diabetes mellitus				6	(30)
		Other				4	(20)
		None				7	(35)
		Laterality
		Right				8	(40)
		Left				9	(45)
		Bilateral				2	(10)
		Unknown				1	(5)
		Disease site
		Renal pelvis				6	(30)
		Clinical stage
		< cT2				3	(15)
		≥ cT2				3	(15)
		Ureter				7	(35)
		Clinical stage
		< cT2				4	(20)
		≥ cT2				3	(15)
		Unknown (no lesion on CT or MRI)				7	(35)
		Urine cytology
		Positive				13	(65)
		Negative				7	(35)
